# Supplementary material for: Recent developments in electrochemistry at the interface between two immiscible electrolyte solutions for ion sensing
Source: Royal Society of Chemistry journal article supplement (doi:10.1039/c5an00601e), 2015-01-01
Supplement: c5an00601e1.pdf [file c5an00601e1.pdf]

**Table 1 : Electrochemical sensors based on ion transfer at the ITIES**

| Target Analyte                                      | Ionophore             | Aqueous electrolyte solution                         | Organic electrolyte solution                                                                                         | Interface type                                              | Detection method | Sensitivity              | Limit of detection                             | Ref. |
|-----------------------------------------------------|-----------------------|------------------------------------------------------|----------------------------------------------------------------------------------------------------------------------|-------------------------------------------------------------|------------------|--------------------------|------------------------------------------------|------|
| Propranolol                                         | No                    | Artificial serum                                     | 10 mM BTPPA <sup>+</sup> TPBCL <sup>-</sup> in PVC-gel (1,6-DCH)                                                     | μITIES array 8 pores (∅ 52 μm, S = 500 μm) silicon membrane | DPSV             | 0.09 nA μM <sup>-1</sup> | 0.05 μM                                        | 1    |
| Myoglobin                                           | Anionic surfactants   | 0.1 M KCl<br>3.0 < pH < 7.1                          | 20 mM TPnA <sup>+</sup> TPB <sup>-</sup> in 1,2-DCE + ionophore                                                      | Single ITIES (∅ 0.2 mm)                                     | DPV              | xx                       | 3 μM                                           | 2    |
| K <sup>+</sup> , Na <sup>+</sup> , Ca <sup>2+</sup> | Commercial ionophores | 0.1 M NaCl or 0.1 M KCl or 0.1 M CaCl <sub>2</sub> . | Gel containing TBA <sup>+</sup> TPB <sup>-</sup> , PVC, ionophore, TCNQ                                              | Single ITIES formed at a 1.5 or 3 mm ∅ GC electrode         | CV               | xx                       | xx                                             | 3    |
| Cd <sup>2+</sup>                                    | 1,10-phenanthroline   | Li <sub>2</sub> SO <sub>4</sub>                      | TDA <sup>+</sup> TPBCL <sup>-</sup> in 1,2-DCE + ionophore                                                           | Single μITIES (∅ 25 μm)                                     | CV               | xx                       | xx                                             | 4    |
| Dopamine, noradrenaline                             | DB18C6                | 1 mM HCl                                             | 10 mM BTPPA <sup>+</sup> TPBCL <sup>-</sup> in 1,2-DCE + ionophore                                                   | μITIES array 66 pores (∅ 10 μm, S = 100 μm) PET membrane    | CV               | xx                       | xx                                             | 5    |
| Protein digest                                      | No                    | 10 mM HCl                                            | 10 mM BTPPA <sup>+</sup> TPBCL <sup>-</sup> in PVC-gel (1,6-DCH)                                                     | μITIES array 8 pores (∅ 52 μm, S = 500 μm) silicon membrane | DPSV             | xx                       | 3 μM (concentration of proteins before digest) | 6    |
| Ca <sup>2+</sup>                                    | Calcium ionophore IV  | 10 mM KCl                                            | Dodecyl 2-nitrophenylether, TDA <sup>+</sup> TPBCL <sup>-</sup> , ionophore + K <sup>+</sup> TPFB <sup>-</sup> + THF | Thin layer ion selective coulometric system                 | Coulometry       | 0.868 C / M              | 10 μM                                          | 7    |
| Ca <sup>2+</sup>                                    | Calcium ionophore IV  | 10 mM KCl                                            | Dodecyl 2-nitrophenylether, TDA <sup>+</sup> TPBCL <sup>-</sup> ,                                                    | Hollow fiber cell                                           | Coulometry       | 29.3 C / M               | 10 μM                                          | 8    |

| Target Analyte                                                         | Ionophore                               | Aqueous electrolyte solution            | Organic electrolyte solution                                                                                                       | Interface type                                                              | Detection method | Sensitivity                   | Limit of detection | Ref. |
|------------------------------------------------------------------------|-----------------------------------------|-----------------------------------------|------------------------------------------------------------------------------------------------------------------------------------|-----------------------------------------------------------------------------|------------------|-------------------------------|--------------------|------|
|                                                                        |                                         |                                         | ionophore + K <sup>+</sup> TPFB <sup>-</sup> + THF                                                                                 |                                                                             |                  |                               |                    |      |
| H <sup>+</sup>                                                         | Hydrogen ionophore IV                   | 10 mM NaCl                              | 3 % PVC NPOE + ionophore + TBA <sup>+</sup> TPBCL <sup>-</sup>                                                                     | Single μ ITIES (elliptic hole 20.2 μm by 110 μm)                            | DPSV             | XX                            | XX                 | 9    |
| Sr <sup>2+</sup>                                                       | CMPO                                    | 2 mM TMA(NO <sub>3</sub> )              | P <sub>66614</sub> TPBCL <sup>-</sup> (RTIL)                                                                                       | Single μITIES (∅ 25 μm)                                                     | CV               | XX                            | XX                 | 10   |
| Parathion, methyl parathion                                            | Hydrogen ionophore IV                   | 10 mM LiCl + organophosphorus hydrolase | 3 % PVC NPOE + ionophore + TBA <sup>+</sup> TPBCL <sup>-</sup>                                                                     | Single μ ITIES (elliptic hole 20.2 μm by 110 μm)                            | DPSV             | XX                            | 0.5 μM             | 11   |
| Ca <sup>2+</sup>                                                       | Calcium ionophore IV                    | 10 mM KCl                               | Dodecyl 2-nitrophenylether, TDA <sup>+</sup> TPBCL <sup>-</sup> , ionophore + K <sup>+</sup> TPFB <sup>-</sup> + THF               | Hollow fiber cell                                                           | Coulometry       | XX<br>Selectivity improvement | XX                 | 12   |
| Ag <sup>+</sup> , K <sup>+</sup> , Ca <sup>2+</sup> , Ba <sup>2+</sup> | Calixarenes, vanilomycin, + another one | Chloride and sulfate salts              | (a) 0.1 M TDA <sup>+</sup> TFAB <sup>-</sup> (NPOE-PVC) + ionophore (b) 0.1 M TDA <sup>+</sup> TFAB <sup>-</sup> (DCE) + ionophore | (a) Au or GC electrode (5 mm) – PEDOT-C14 (b) single ITIES (∅ 5 μm pipette) | CV               | XX                            | XX                 | 13   |
| Paraoxon                                                               | Hydrogen ionophore IV                   | 10 mM NaCl                              | 3 % PVC NPOE + ionophore + TBA <sup>+</sup> TPBCL <sup>-</sup>                                                                     | Single μ ITIES (elliptic hole 20.2 μm by 110 μm)                            | DPSV             | XX                            | 0.5 μM             | 14   |
| Lysozyme                                                               | No                                      | 10 mM HCl                               | 10 mM BTPPA <sup>+</sup> TPBCL <sup>-</sup> in PVC-gel (1,6-DCH)                                                                   | μITIES array 30 pores (∅ 22 μm, S = 200 μm) silicon membrane                | AdDPSV           | 4.31 nA μM <sup>-1</sup>      | 0.03 μM            | 15   |
| Propranolol                                                            | α <sub>1</sub> -acid-                   | 10 mM LiCl + x                          | 10 mM BTPPA <sup>+</sup>                                                                                                           | Single μITIES (∅ 10 μm)                                                     | DPV, CV          | XX                            | XX                 | 16   |

| Target Analyte                | Ionophore    | Aqueous electrolyte solution                                       | Organic electrolyte solution                                                                   | Interface type                                                                                                | Detection method | Sensitivity                                 | Limit of detection        | Ref. |
|-------------------------------|--------------|--------------------------------------------------------------------|------------------------------------------------------------------------------------------------|---------------------------------------------------------------------------------------------------------------|------------------|---------------------------------------------|---------------------------|------|
|                               | glycoprotein | $\mu\text{M}$ Phosphate buffer                                     | TPBCl <sup>-</sup> in 1,2-DCE                                                                  | pipette)                                                                                                      |                  |                                             |                           |      |
| Poly-L-Lysine dendrigrafts    | No           | 10 mM HCl                                                          | 10 mM BTPPA <sup>+</sup> TPBCl <sup>-</sup> in 1,2-DCE                                         | Single ITIES ( $\varnothing$ 1 cm)                                                                            | CV               | 1.84 – 25.8 $\mu\text{A } \mu\text{M}^{-1}$ | 0.65– 11.10 $\mu\text{M}$ | 17   |
| Myoglobin                     | No           | 10 mM HCl or 1-100 mM LiCl                                         | 10 mM BTPPA <sup>+</sup> TPBCl <sup>-</sup> in PVC-gel (1,6-DCH)                               | $\mu\text{ITIES}$ array 8 pores ( $\varnothing$ 12.8 $\mu\text{m}$ , S = 400 $\mu\text{m}$ ) silicon membrane | CV               | XX                                          | 1 $\mu\text{M}$           | 18   |
| Heparin                       | No           | 10 mM LiCl or NaCl                                                 | TDMA <sup>+</sup> TFPB <sup>-</sup> (RTIL)                                                     | PVDF microporous filter (A = 0.07 cm <sup>2</sup> )                                                           | CV               | XX                                          | 0.1 U mL <sup>-1</sup>    | 19   |
| Er(III)                       | HDB          | 0.1 M MgCl <sub>2</sub>                                            | Graphite powder, 5 % MWCNT, [OMIM] <sup>+</sup> BF <sub>4</sub> <sup>-</sup> , ionophore, TCNQ | Composite carbon electrode                                                                                    | DPV              | 19.9 mV per decade                          | 0.5 $\mu\text{M}$         | 20   |
| Cr(VI)                        | Aliquat 336  | 10 mM K <sub>2</sub> SO <sub>4</sub>                               | 3 % PVC NPOE + ionophore + 10 mM TOA <sup>+</sup> TFAB <sup>-</sup>                            | $\mu\text{ITIES}$ array 66 pores ( $\varnothing$ 10 $\mu\text{m}$ , S = 100 $\mu\text{m}$ ) PET membrane      | DPSV             | 1.37 nA $\mu\text{M}^{-1}$                  | 0.5 $\mu\text{M}$         | 21   |
| Rb <sup>+</sup>               | CMPO         | 5 mM Rb(NO <sub>3</sub> )                                          | P <sub>66614</sub> TPBCl <sup>-</sup> (RTIL)                                                   | Single $\mu\text{ITIES}$ ( $\varnothing$ 25 $\mu\text{m}$ )                                                   | CV               | XX                                          | XX                        | 22   |
| Albumin                       | DNNS         | 0.1 M KCl (pH 3.4)                                                 | 20 mM TPnA <sup>+</sup> TPB <sup>-</sup> in 1,2-DCE + ionophore                                | Porous membrane supported interface                                                                           | CA (FIA)         | 1.8 C M <sup>-1</sup>                       | 1.2 $\mu\text{M}$         | 23   |
| Creatinine                    | No           | 0.05 M MgCl <sub>2</sub> + H <sub>2</sub> SO <sub>4</sub> (pH 2.2) | 20 mM TPnA <sup>+</sup> TPB <sup>-</sup> in NB                                                 | Dialysis membrane supported interface                                                                         | CA (FIA)         | 0.648 $\mu\text{A } \text{mM}^{-1}$         | 210 $\mu\text{M}$         | 24   |
| NH <sub>4</sub> <sup>+</sup>  | Cyclodextrin | 1 mM HCl                                                           | 1 mM BTPPA <sup>+</sup> TPBCl <sup>-</sup> in 1,6-DCH                                          | $\mu\text{ITIES}$ array 66 pores ( $\varnothing$ 10 $\mu\text{m}$ , S = 100 $\mu\text{m}$ ) PET membrane      | dSWV             | 1.01 nA $\mu\text{M}^{-1}$                  | 0.12 $\mu\text{M}$        | 25   |
| ClO <sub>4</sub> <sup>-</sup> | No           | 10 mM NaCl                                                         | 3 % PVC NPOE + 10 mM TOA <sup>+</sup> TFAB <sup>-</sup>                                        | $\mu\text{ITIES}$ array 66 pores ( $\varnothing$ 10 $\mu\text{m}$ , S = 100 $\mu\text{m}$ ) PET membrane      | DPSV             | 1.32 nA $\mu\text{M}^{-1}$                  | 0.1 $\mu\text{M}$         | 26   |

| Target Analyte                                      | Ionophore             | Aqueous electrolyte solution                                                              | Organic electrolyte solution                                                                     | Interface type                                               | Detection method | Sensitivity                                | Limit of detection       | Ref. |
|-----------------------------------------------------|-----------------------|-------------------------------------------------------------------------------------------|--------------------------------------------------------------------------------------------------|--------------------------------------------------------------|------------------|--------------------------------------------|--------------------------|------|
| NO <sub>3</sub> <sup>-</sup>                        | TDMA <sup>+</sup>     | 1 mM NaCl                                                                                 | TDA <sup>+</sup> TPBCL <sup>-</sup> , ionophore + THF + DOS                                      | Thin layer ion selective coulometric system                  | Coulometry       | 3.6 C M <sup>-1</sup>                      | 1.1 μM                   | 27   |
| K <sup>+</sup>                                      | Valinomycin           | 0.1 mM NaI                                                                                | Dodecyl 2-nitrophenylether, TDA <sup>+</sup> TPBCL <sup>-</sup> , ionophore + KTPBCL + THF + PVC | Thin layer ion selective coulometric system                  | Coulometry       | 1.18 C M <sup>-1</sup>                     | 0.1 μM                   | 28   |
| K <sup>+</sup> , NH <sub>4</sub> <sup>+</sup>       | Valinomycin           | K <sub>2</sub> SO <sub>4</sub> , 0.5 mM<br>H <sub>2</sub> SO <sub>4</sub> , 0.1 mM<br>HCl | 0.1 M TDA <sup>+</sup> TFAB <sup>-</sup> (NPOE-PVC) + ionophore                                  | Rotating Au electrode (5 mm) – PEDOT-C14                     | DPSV             | 21.2 nA nM <sup>-1</sup> (K <sup>+</sup> ) | 0.6 nM (K <sup>+</sup> ) | 29   |
| Amylin                                              | No                    | 10 mM HCl or 1 mM PBS                                                                     | 10 mM BTPPA <sup>+</sup> TPBCL <sup>-</sup> in PVC-gel (1,6-DCH)                                 | μITIES array 30 pores (∅ 22 μm, S = 200 μm) silicon membrane | CV               | 0.13 nA μM <sup>-1</sup>                   | 2 μM                     | 30   |
| Insulin                                             | No                    | 10 mM HCl                                                                                 | 10 mM BTPPA <sup>+</sup> TPBCL <sup>-</sup> in PVC-gel (1,6-DCH)                                 | μITIES array 30 pores (∅ 22 μm, S = 200 μm) silicon membrane | AdSV             | XX                                         | 1 μM                     | 31   |
| Haemoglobin                                         | No                    | 10 mM HCl                                                                                 | 10 mM BTPPA <sup>+</sup> TPBCL <sup>-</sup> in PVC-gel (1,6-DCH)                                 | μITIES array 30 pores (∅ 22 μm, S = 200 μm) silicon membrane | AdSV             | 7.46 nA μM <sup>-1</sup>                   | 48 nM                    | 32   |
| K <sup>+</sup> , Na <sup>+</sup> , Ca <sup>2+</sup> | Commercial ionophores | Sea water and drink sample, plasma and whole blood                                        | Gel containing TBA <sup>+</sup> TPB <sup>-</sup> , PVC, ionophore, TCNQ                          | Screen-printed electrode modified with a gel                 | CV               | xx                                         | xx                       | 33   |
| Daunorubicin                                        | No                    | Buffered solution (2 < pH < 12)                                                           | 1 mM BTPPA <sup>+</sup> TPBCL <sup>-</sup> in 1,6-DCH                                            | μITIES array 66 pores (∅ 10 μm, S = 100 μm) PET membrane     | DPV              | 0.019 nA μM <sup>-1</sup>                  | 0.8 μM                   | 34   |
| Dopamine,                                           | DB18C6                | 1 mM HCl (pH 3)                                                                           | 1 mM BTPPA <sup>+</sup>                                                                          | μITIES array 66 pores                                        | SWV              | 0.199 nA μM <sup>-1</sup>                  | 0.35 μM                  | 35   |

| Target Analyte                                         | Ionophore                                                                | Aqueous electrolyte solution                     | Organic electrolyte solution                                                                               | Interface type                                                                           | Detection method | Sensitivity                                              | Limit of detection                     | Ref. |
|--------------------------------------------------------|--------------------------------------------------------------------------|--------------------------------------------------|------------------------------------------------------------------------------------------------------------|------------------------------------------------------------------------------------------|------------------|----------------------------------------------------------|----------------------------------------|------|
| Noradrenaline                                          |                                                                          |                                                  | TPBCl <sup>-</sup> , 10 mM DB18C6 in 1,6-DCH                                                               | ( $\varnothing$ 10 $\mu$ m, S = 100 $\mu$ m) PET membrane                                |                  | (Dopamine) 0.04 nA $\mu$ M <sup>-1</sup> (Noradrenaline) | (Dopamine) 1.7 $\mu$ M (Noradrenaline) |      |
| K <sup>+</sup> , Na <sup>+</sup>                       | DB18C6 derivative (K <sup>+</sup> ), B15C5 derivative (Na <sup>+</sup> ) | KCl and NaCl solutions                           | 2 mM BTPPA <sup>+</sup> TPBCl <sup>-</sup> , ionophore in 1,2-DCE                                          | Single $\mu$ TIES ( $\varnothing$ 28-34 $\mu$ m)                                         | CV               | XX                                                       | XX                                     | 36   |
| ClO <sub>4</sub> <sup>-</sup>                          | Ni(DBM) <sub>2</sub>                                                     | 10 mM NaCl + River water                         | 3 % PVC NPOE + 10 mM TOA <sup>+</sup> TFAB <sup>-</sup>                                                    | $\mu$ TIES array 66 pores ( $\varnothing$ 10 $\mu$ m, S = 100 $\mu$ m) PET membrane      | DPSV             | 0.21 nA ppm <sup>-1</sup>                                | 10 ppb                                 | 37   |
| Myoglobin, haemoglobin                                 | AOT <sup>-</sup>                                                         | 10 mM HCl                                        | 10 mM BTPPA <sup>+</sup> TPBCl <sup>-</sup> or 10 mM Na <sup>+</sup> AOT <sup>-</sup> in PVC-gel (1,6-DCH) | $\mu$ TIES array 8 pores ( $\varnothing$ 12.8 $\mu$ m, S = 400 $\mu$ m) silicon membrane | CV               | XX                                                       | XX                                     | 38   |
| Cs <sup>+</sup>                                        | CMPO                                                                     | 5 mM CsNO <sub>3</sub>                           | CPMO + P <sub>66614</sub> TPBCl <sup>-</sup> (RTIL)                                                        | Single $\mu$ TIES ( $\varnothing$ 25 $\mu$ m)                                            | CV               | XX                                                       | XX                                     | 39   |
| Cd <sup>2+</sup>                                       | 8-HQ                                                                     | 10 mM LiCl                                       | 5 mM THA <sup>+</sup> TPBCl <sup>-</sup> 50 mM 8-HQ in 1,2-DCE                                             | $\mu$ TIES array (1-256 pores, $\varnothing$ 50 $\mu$ m, S = 500 $\mu$ m)                | SWV              | 0.046 nA ppb <sup>-1</sup>                               | 11 ppb                                 | 40   |
| Cd <sup>2+</sup> , Zn <sup>2+</sup> , Pb <sup>2+</sup> | 8-HQ                                                                     | 10 mM LiCl                                       | 5 mM THA <sup>+</sup> TPBCl <sup>-</sup> 50 mM 8-HQ in 1,2-DCE                                             | $\mu$ TIES array (1-256 pores, $\varnothing$ 50 $\mu$ m, S = 500 $\mu$ m)                | SWV              | XX                                                       | 0.2 ppm (Pb <sup>2+</sup> )            | 41   |
| Perfluoroalkanesulfonate, Perfluoroalkane carbonate,   | No                                                                       | 1 M Li <sub>2</sub> SO <sub>4</sub> , 0.1 mM KCl | 0.1 M TDA <sup>+</sup> TFAB <sup>-</sup> , NPOE-PVC                                                        | Au electrode (5 mm) – POT                                                                | LSSV             | XX                                                       | 50 pM                                  | 42   |
| Heparin                                                | DNNS-TDA <sup>+</sup>                                                    | Human blood                                      | Ionophore +                                                                                                | Thin layer ion selective                                                                 | Coulometry       | XX                                                       | XX                                     | 43   |

| Target Analyte                       | Ionophore            | Aqueous electrolyte solution       | Organic electrolyte solution                                     | Interface type                                                                                     | Detection method | Sensitivity                                                                   | Limit of detection                       | Ref. |
|--------------------------------------|----------------------|------------------------------------|------------------------------------------------------------------|----------------------------------------------------------------------------------------------------|------------------|-------------------------------------------------------------------------------|------------------------------------------|------|
|                                      |                      |                                    | NPOE                                                             | coulometric system                                                                                 |                  |                                                                               |                                          |      |
| Ca <sup>2+</sup>                     | Calcium ionophore II | 10 mM CH <sub>3</sub> COOK         | 0.1 M TDA <sup>+</sup> TFAB <sup>-</sup> , NPOE-PVC              | Rotating Au electrode (5 mm) – PEDOT                                                               | LSSV             | 430 A M <sup>-1</sup>                                                         | 0.1 nM                                   | 44   |
| Propranolol                          | No                   | Artificial biological fluid        | 10 mM BTPPA <sup>+</sup> TPBCl <sup>-</sup> in PVC-gel (1,6-DCH) | μITIES array (52 pores, Ø 55 μm, S = 1000 μm)                                                      | DPSV             | 43 nA μM <sup>-1</sup>                                                        | 50 nM                                    | 45   |
| Ractopamine                          | No                   | 10 mM LiCl                         | 10 mM BTPPA <sup>+</sup> TPBCl <sup>-</sup> in PVC-gel (1,6-DCH) | μITIES array 8 pores (Ø 22.2 μm, S = 200 μm) silicon membrane                                      | LSSV             | 0.272 nA μM <sup>-1</sup>                                                     | 0.1 μM                                   | 46   |
| Propranolol                          | No                   | 10 mM LiCl                         | 10 mM BTPPA <sup>+</sup> TPBCl <sup>-</sup> in 1,6-DCH           | nanolITIES array 400 pores (Ø 100 nm or 34 nm, S = 10 times the diameter) silicon nitride membrane | CV               | 0.0018 nA μM <sup>-1</sup> (Ø 34 nm)<br>0.0011 nA μM <sup>-1</sup> (Ø 100 nm) | 0.8 nM                                   | 47   |
| Acetylcholine, tryptamine, serotonin | No                   | Artificial seawater                | 5 mM TDA <sup>+</sup> TFAB <sup>-</sup> in 1,2DCE                | Single nanolITIES (Ø 19-35 nm))                                                                    | CV               | XX                                                                            | 205 μM (Acetylcholine), 86 μM Tryptamine | 48   |
| Topotecan                            | No                   | 10 mM Tris acetic acid buffer pH 4 | 10 mM TOA <sup>+</sup> TFAB <sup>-</sup> in PVC-NPOE             | Single μITIES (Elliptical microhole 38 × 23 μm)                                                    | DPSV             | 0.012 nA μM <sup>-1</sup>                                                     | 0.1 μM                                   | 49   |

**List of abbreviations.**

**Ionophore:** DB18C6: dibenzo-18-crown-6; Calcium ionophore IV: *N,N*-Dicyclohexyl-*N',N'*-dioctadecyl-3-oxapentanediamide; Hydrogen ionophore IV: Octadecyl isonicotinate; CMPO: octyl-(phenyl)-*N,N*-diisobutylcarbamoylmethylphosphine; HDB: *N'*-(2-hydroxy-1,2-diphenylethylidene); Aliquat 336: tricaprylmethylammonium chloride; DNNS: dinonylnaphthalenesulfonate; TDMA<sup>+</sup>: tridodecylmethylammonium; B15C5: benzo-15-crown-5; Ni(DBM)<sub>2</sub>: bis(dibenzoylmethanato)Ni(II); AOT<sup>-</sup>: 1,4-bis(2-ethylhexoxy)-1,4-dioxobutane-2-sulfonate; 8-HQ: 8-hydroxyquinolinol; TDA<sup>+</sup>: tetradodecylammonium; Calcium ionophore II: *N,N,N',N'*-Tetra[cyclohexyl]diglycolic acid diamide. **Aqueous electrolyte solution:** PBS: Phosphate buffer saline. **Organic electrolyte solution:** BTPPA<sup>+</sup>: Bis(triphenylphosphoranylidene)ammonium; TPBCl<sup>-</sup>: tetrakis(4-chlorophenyl)borate; PVC: poly(vinyl chloride); 1,6-DCH: 1,6-dichlorohexane; TPnA<sup>+</sup>: tetrapentylammonium; TPB<sup>-</sup>: tetrphenylborate; 1,2-DCE: 1,2-dichloroethane; TBA<sup>+</sup>: tetrabutylammonium; TCNQ: 7,7,8,8-tetracyanoquinodimethane; TPFB<sup>-</sup>: tetrakis[3,4-bis(trifluoromethyl)phenyl]borate; THF: tetrahydrofuran; NPOE: *o*-nitrophenyloctylether; P<sub>66614</sub>: trihexyltetradecylphosphonium; TFAB<sup>-</sup>: tetrakis(pentafluorophenyl)borate; MWCNT:

multiwalled carbon nanotubes; [OMIM]<sup>+</sup>: 1-octyl-3-methylimidazolium; TOA<sup>+</sup>: tetraoctylammonium; DOS: [bis(3-ethyl-hexyl)sebacate]; THA<sup>+</sup>: tetrahexylammonium; Interface type:  $\mu$ TIES: micro-interface between two immiscible electrolyte solutions; S: spacing; GC: glassy carbon; PET: polyethylene terephthalate; PEDOT: poly(2-*n*-tetradecyl-2,3-dihydro-thieno[3,4-*b*][1,4]dioxin); PVDF: polyvinylidene fluoride; POT: poly(octylthiophene); **Detection method:** DPSV: Differential pulse stripping voltammetry; DPV: Differential pulse voltammetry; CV: cyclic voltammetry; AdDPSV: Adsorptive differential pulse stripping voltammetry; CA: Chronoamperometry; FIA: Flow injection analysis; dSWV: numerical derivative square wave voltammetry; AdSV: Adsorptive stripping voltammetry; SWV: Square wave voltammetry; LSSV: Linear sweep stripping voltammetry.

## References

1. C. J. Collins, C. Lyons, J. Strutwolf, and D. W. M. Arrigan, *Talanta*, 2010, **80**, 1993–1998.
2. T. Osakai, Y. Yuguchi, E. Gohara, and H. Katano, *Langmuir*, 2010, **26**, 11530–11537.
3. J. Zhang, A. R. Harris, R. W. Cattrall, and A. M. Bond, *Anal. Chem.*, 2010, **82**, 1624–1633.
4. A. Benvidi, S. N. Lanjwani, and Z. Ding, *Electrochim. Acta*, 2010, **55**, 2196–2200.
5. J. A. Ribeiro, I. M. Miranda, F. Silva, and C. M. Pereira, *Phys. Chem. Chem. Phys.*, 2010, **12**, 15190–15194.
6. G. Herzog, A. Roger, D. Sheehan, and D. W. M. Arrigan, *Anal. Chem.*, 2010, **82**, 258–264.
7. E. Grygolicz-Pawlak and E. Bakker, *Anal. Chem.*, 2010, **82**, 4537–4542.
8. E. Grygolicz-Pawlak and E. Bakker, *Electrochem. Commun.*, 2010, **12**, 1195–1198.
9. S. N. Faisal, C. M. Pereira, S. Rho, and H. J. Lee, *Phys. Chem. Chem. Phys.*, 2010, **12**, 15184–15189.
10. T. J. Stockmann, Y. Lu, J. Zhang, H. H. Girault, and Z. Ding, *Chem. - A Eur. J.*, 2011, **17**, 13206–13216.
11. M. M. Hossain, C. S. Kim, H. J. Cha, and H. J. Lee, *Electroanalysis*, 2011, **23**, 2049–2056.
12. E. Grygolicz-Pawlak, A. Numnuam, P. Thavarungkul, P. Kanatharana, and E. Bakker, *Anal. Chem.*, 2012, **84**, 1327–1335.
13. R. Ishimatsu, A. Izadyar, B. Kabagambe, Y. Kim, J. Kim, and S. Amemiya, *J. Am. Chem. Soc.*, 2011, **133**, 16300–16308.
14. M. M. Hossain, S. N. Faisal, C. S. Kim, H. J. Cha, S. C. Nam, and H. J. Lee, *Electrochem. Commun.*, 2011, **13**, 611–614.
15. E. Alvarez De Eulate and D. W. M. Arrigan, *Anal. Chem.*, 2012, **84**, 2505–2511.



16. P. Lopes and R. Kataký, *Anal. Chem.*, 2012, **84**, 2299–2304.
17. G. Herzog, S. Flynn, C. Johnson, and D. W. M. Arrigan, *Anal. Chem.*, 2012, **84**, 5693–5699.
18. S. O’Sullivan and D. W. M. Arrigan, *Electrochim. Acta*, 2012, **77**, 71–76.
19. J. Langmaier, Z. Samec, E. Samcová, and P. Tůma, *Electrochem. Commun.*, 2012, **24**, 25–27.
20. R. Mirshafian, P. Norouzi, and M. R. Ganjali, *Electroanalysis*, 2012, **24**, 433–438.
21. M. M. Hossain, S. H. Lee, H. H. Girault, V. Devaud, and H. J. Lee, *Electrochim. Acta*, 2012, **82**, 12–18.
22. T. J. Stockmann, A. M. Montgomery, and Z. Ding, *Anal. Chem.*, 2012, **84**, 6143–6149.
23. R. Matsui, T. Sakaki, and T. Osakai, *Electroanalysis*, 2012, **24**, 1164–1169.
24. R. Matsui, T. Sakaki, and T. Osakai, *Electroanalysis*, 2012, **24**, 2325–2331.
25. J. A. Ribeiro, F. Silva, and C. M. Pereira, *Talanta*, 2012, **88**, 54–60.
26. M. Hossain, H. H. Girault, and H. J. Lee, *Bull. Korean Chem. Soc.*, 2012, **33**, 1734–1740.
27. M. Sohail, R. De Marco, K. Lamb, and E. Bakker, *Anal. Chim. Acta*, 2012, **744**, 39–44.
28. A. Shvarev, B. Neel, and E. Bakker, *Anal. Chem.*, 2012, **84**, 8038–8044.
29. B. Kabagambe, A. Izadyar, and S. Amemiya, *Anal. Chem.*, 2012, **84**, 7979–7986.
30. E. Alvarez de Eulate, S. O’Sullivan, S. Fletcher, P. Newsholme, and D. W. M. Arrigan, *Chem. Asian J.*, 2013, **8**, 2096–2101.
31. S. O’Sullivan, E. Alvarez de Eulate, Y. H. Yuen, E. Helmerhorst, and D. W. M. Arrigan, *Analyst*, 2013, **138**, 6192–6196.
32. E. Alvarez De Eulate, L. Serls, and D. W. M. Arrigan, *Anal. Bioanal. Chem.*, 2013, **405**, 3801–3806.

33. A. R. Harris, J. Zhang, R. W. Cattrall, and A. M. Bond, *Anal. Methods*, 2013, **5**, 3840–3852.
34. J. A. Ribeiro, F. Silva, and C. M. Pereira, *Anal. Chem.*, 2013, **85**, 1582–1590.
35. J. A. Ribeiro, F. Silva, and C. M. Pereira, *Electroanalysis*, 2013, **25**, 2331–2338.
36. Y. Qiao, B. Zhang, X. Zhu, T. Ji, B. Li, Q. Li, E. Chen, and Y. Shao, *Electroanalysis*, 2013, **25**, 1080–1084.
37. S. H. Lee, H. Kim, H. H. Girault, and H. J. Lee, *Bull. Korean Chem. Soc.*, 2013, **34**, 2577–2582.
38. S. O’Sullivan and D. W. M. Arrigan, *Anal. Chem.*, 2013, **85**, 1389–1394.
39. T. J. Stockmann, J. Zhang, A. M. Montgomery, and Z. Ding, *Anal. Chim. Acta*, 2014, 821, 41–47.
40. A. Mastouri, S. Peulon, D. Farcage, N. Bellakhal, and A. Chaussé, *Electrochim. Acta*, 2014, **120**, 212–218.
41. A. Mastouri, S. Peulon, N. Bellakhal, and A. Chaussé, *Electrochim. Acta*, 2014, **130**, 818–825.
42. M. B. Garada, B. Kabagambe, Y. Kim, and S. Amemiya, *Anal. Chem.*, 2014, **86**, 11230–11237.
43. G. A. Crespo, M. G. Afshar, D. Dorokhin, and E. Bakker, *Anal. Chem.*, 2014, **86**, 1357–1360.
44. B. Kabagambe, M. B. Garada, R. Ishimatsu, and S. Amemiya, *Anal. Chem.*, 2014, **86**, 7939–7946.
45. P. Vazquez, G. Herzog, C. O’Mahony, J. O’Brien, J. Scully, A. Blake, C. O’Mathuna, and P. Galvin, *Sensor. Actuat. B*, 2014, **201**, 572–578.
46. M. Sairi and D. W. M. Arrigan, *Talanta*, 2015, **132**, 205–214.
47. Y. Liu, J. Strutwolf, and D. W. M. Arrigan, *Anal. Chem.*, 2015, **87**, 4487–4494.
48. M. L. Colombo, J. V. Sweedler, and M. Shen, *Anal. Chem.*, 2015, doi:10.1021/ac504151e.
49. H. R. Kim, C. M. Pereira, H. Y. Han, and H. J. Lee, *Anal. Chem.*, 2015, **in press**.
